## Hydroxyzine in Acute Hypertension: A Cohort Study

Jakub Nożewski, PhD<sup>1</sup>, Piotr Remiszewski<sup>2,3</sup>, Kinga Filipek<sup>3,4</sup>, Agata Pisklak<sup>3,4</sup>, Aleksandra Abramczyk<sup>5</sup>, Stanisław Pyzel<sup>6</sup>, Daniel Śliż, PhD<sup>3</sup>

<sup>1</sup>Department of Emergency Medicine, University Hospital No 2 in Bydgoszcz, Ujejskiego 75, 85-168 Bydgoszcz, Poland.

<sup>2</sup>Faculty of Medicine, Medical University of Warsaw, 02-091 Warsaw, Poland.

<sup>3</sup>3rd Department of Internal Medicine and Cardiology, Medical University of Warsaw, Warsaw, Poland.

<sup>4</sup>Regional Hospital in Międzyzylesie, Warsaw, Poland.

<sup>5</sup>Medical University of Gdańsk, Gdańsk 80-210, Poland.

<sup>6</sup> Nicolaus Copernicus University in Toruń, Collegium Medicum in Bydgoszcz, 85-094 Bydgoszcz, Poland.

**Corresponding author:**

Piotr Remiszewski

[piotrremiszewski789@gmail.com](mailto:piotrremiszewski789@gmail.com)

3rd Department of Internal Medicine and Cardiology,

Medical University of Warsaw,

Bursztynowa 2,

04-749 Warsaw, Poland

**NOTE:** This preprint reports new research that has not been certified by peer review and should not be used to guide clinical practice.

**32 Abstract**

33 Captopril, an ACE inhibitor, is widely used for acute hypertensive episodes, while  
34 hydroxyzine, an antihistamine with sedative and anxiolytic effects, is also employed in Poland  
35 despite limited research on its efficacy for this purpose. To our knowledge, no prior studies  
36 have specifically investigated the direct impact of hydroxyzine on hypertension, despite its  
37 common use in Polish medical practice.

38

39 A retrospective cohort analysis of 2144 patients who required emergency intervention for  
40 hypertension or had high blood pressure during other interventions. Effectiveness was based  
41 on blood pressure improvement post-intervention.

42

43 84.28% of interventions were performed by basic emergency teams, and 15.72% by specialist  
44 teams. Captopril and hydroxyzine were the most commonly used medications. Blood pressure  
45 improved in 36.61% of patients, with no improvement in 41.47%. Hydroxyzine was more  
46 frequently administered by paramedic teams, while captopril was favoured by specialist teams.  
47 There were no statistically significant differences in captopril use across age groups, with  
48 approximately 80% receiving it. Hydroxyzine use did not vary significantly by age, though its  
49 overall use was low. Hydroxyzine showed a non-significant trend towards greater blood  
50 pressure reduction compared to captopril.

51

52 Captopril is the primary treatment for acute hypertension in emergency settings, but  
53 hydroxyzine may have potential benefits, especially in patients with anxiety-related  
54 hypertension. However, due to the lack of significant evidence and current guidelines advising  
55 against hydroxyzine in elderly patients, further research is needed to establish protocols and  
56 optimize hypertension treatment strategies. Additionally, incorporating anxiolytics into  
57 guidelines and an official statement on their use would aid clinical practice.

58

59

60

61

62

## 63 Introduction

64 According to the Polish Central Statistical Office, in 2022<sup>1</sup>, medical rescue teams made almost  
65 3.1 million trips or departures to the emergency scene, of which 6.7% were children and  
66 adolescents under 18 years of age, and 48.5% were people aged 65 and over. The elderly  
67 accounted for almost half of those calling for the Emergency Medical Services Team. 1,592  
68 Medical Rescue Teams were operating within the State Medical Rescue System in 2022, of  
69 which 1,271 were basic and 321 specialised. One very common reason for calling an  
70 Emergency Medical Response Team is a sudden increase in blood pressure.<sup>2</sup>

71 Hypertension is defined as office-measured systolic blood pressure  
72 (sBP) of  $\geq 140$  mmHg and/or diastolic blood pressure (DBP) of  $\geq 90$   
73 mmHg. The World Health Organization (WHO) has identified  
74 hypertension as the leading cause of premature death worldwide. In  
75 2015, the global prevalence of hypertension was estimated to be 1.13  
76 billion.<sup>3</sup> Among hypertensive patients calling the emergency medical team, we can  
77 distinguish two conditions: emergency and urgent. Emergency conditions in hypertension are  
78 defined as situations in which significantly elevated blood pressure (BP) values are  
79 accompanied by the development of acute organ complications, systolic blood pressure is  
80 generally over 180 mmHg, and diastolic blood pressure is over 110 mmHg.<sup>4</sup> Patients report a  
81 range of symptoms, including headaches, visual disturbances, chest pain, shortness of breath,  
82 dizziness and neurological deficits. These patients may develop changes in the fundus of the  
83 eye, microangiopathy, disseminated intravascular coagulation (DIC), encephalopathy, acute  
84 heart failure, and acute impairment of renal function. The emergency is associated with the  
85 need to administer drugs intravenously.<sup>5</sup> The drugs used in this case include  $\beta$ -blockers  
86 (esmolol, metoprolol, labetalol), fenoldopam, clevidipine, nicardipine, nitroglycerin, sodium  
87 nitroprusside, rapidly, clonidine, phentolamine, enalaprilat, among others. In an emergency,  
88 enalaprilat is the only angiotensin-converting enzyme inhibitor (ACEI) drug that can be used.  
89 The European Society of Cardiology guidelines do not recommend the use of captopril and  
90 hydroxyzine in hypertension-related emergencies.<sup>6</sup> Hypertension urgency differs from  
91 emergency hypertension in the absence of acute organ complications. In these patients,  
92 hospitalization is not required, and blood pressure reduction can be carried out by oral route.  
93 In this case, the drug groups used are ACE inhibitors, ARBs or  $\beta$ -blockers. In an urgency, we

94 can use captopril orally or sublingually.<sup>7</sup> The guidelines do not provide any information on the  
95 use of hydroxyzine in treating acute hypertension.<sup>1</sup>

96

97 Angiotensin-converting enzyme inhibitors (ACEIs) represent a pivotal class of  
98 pharmaceuticals in the field of medicine. They are employed in the treatment of hypertension,  
99 heart failure, ischemic heart disease, and certain kidney diseases.<sup>8</sup> Their mechanism of action  
100 involves the inhibition of the angiotensin-converting enzyme, which converts angiotensin I into  
101 angiotensin II. Angiotensin II raises blood pressure, mainly through vasoconstriction and by  
102 stimulating aldosterone secretion in the renin-angiotensin-aldosterone (RAA) system.<sup>9</sup>  
103 Furthermore, the body increases the levels of angiotensin I, which in turn increases the release  
104 of nitrogen oxide, which has a vasodilatory effect on the blood vessels. Captopril belongs to  
105 the ACEI group and is one of the most commonly used drugs in this group for the treatment of  
106 hypertension, either as monotherapy or in combination with other drugs. It was the first drug  
107 from the ACEI group to be introduced to the pharmacological market; the drug was developed  
108 in 1975.<sup>10</sup> When administered orally, it is absorbed in 75%.<sup>11</sup> In Polish conditions, it is  
109 frequently used in sublingual or oral form for acute conditions associated with an increase in  
110 blood pressure. It has been demonstrated that the efficacy of the drug does not vary according  
111 to the route of administration, whether orally or sublingually.<sup>12</sup> A less common drug  
112 administered to patients with sudden increases in blood pressure by emergency medical teams  
113 is hydroxyzine. Hydroxyzine is not typically used as a first-line treatment for sudden increase  
114 in blood pressure. It is primarily an antihistamine medication used to treat allergic reactions,  
115 itching, and anxiety. While it may have some sedative effects, it does not have significant  
116 antihypertensive properties. However, there are scenarios where anxiety or stress can  
117 contribute to elevated blood pressure readings. In such cases, if anxiety is a contributing factor  
118 to hypertension, hydroxyzine may be prescribed to help manage anxiety symptoms, potentially  
119 leading to a reduction in blood pressure.

120

## 121 **Methods**

122 The study has been using retrospective cohort analysis. The provided data pertained to 2188  
123 patients. We included data from 14 teams consisting of 2 paramedics and 3 teams consisting of  
124 a paramedic, a nurse, and a doctor, who were dispatched in 2019 to assist patients due to  
125 hypertension or other illnesses, but in the latter case, hypertension was also noted. We included  
126 the data from. The dosages for captopril were 25 mg and 12.5 mg. The data for this study was

127 collected from 15 Basic Medical Rescue Teams (Podstawowe Zespoły Ratownictwa  
128 Medycznego) and 3 Specialist Teams (Zespoły Specjalistyczne). These teams operate under  
129 the Provincial Ambulance Station (Wojewódzka Stacja Pogotowia). For 57 individuals, the  
130 data were incomplete – these individuals did not have a registered PESEL number.  
131 Consequently, it was not possible to automatically determine the gender and age of these  
132 patients. Gender and age were established for 13 of them based on information entered in one  
133 of the columns, i.e., in the interview section. The remaining 44 patients without specified  
134 gender and age were preliminarily excluded from the analysis. Ultimately, the analysis covered  
135 2144 patients. A significance level of 0.05 was adopted for the conducted tests.

136 Due to the left-skewed asymmetry in the age distribution and the presence of outliers when  
137 analysing age, non-parametric methods need to be used. The Mann-Whitney U test yielded  $U$   
138  $= 275008.500$ , where  $p < 0.001$ . These results suggest that there is a statistically significant  
139 difference in the median ages between the groups under investigation. In addition to p-values,  
140 we calculated Cohen's  $d$  to quantify the effect size of the treatments. Cohen's  $d$  is a measure of  
141 the strength of the treatment effect, providing insight into the practical significance of the  
142 findings beyond mere statistical significance.

143 The first group of variables are quantitative variables. These include the ones related to pulse,  
144 glucose level, systolic blood pressure, and diastolic blood pressure. Pulse and glucose were  
145 measured once, while blood pressure was measured up to three times, hence resulting in 6  
146 variables related to blood pressure: systolic pressure1, systolic pressure2, systolic pressure3,  
147 diastolic pressure1, diastolic pressure2, diastolic pressure3.

148 The second group consists of qualitative variables. Among them is the type of ambulance. The  
149 basic team (Team P) was called for 1807 individuals (84.28%), while the specialised team  
150 (Team S) was called for the remaining 337 individuals (15.72%).

151 The study also employed CART decision tree analysis to ascertain the factors influencing  
152 whether patients were transferred to the hospital or not. The process involved dividing the  
153 dataset into 10 parts for 10-fold cross-validation. CART trees were built on each training set,  
154 considering variables such as systolic and diastolic improvements, gender, age, EMT type,  
155 pulse, glucose, improvement status, and reason for the call. The model yielded 10 trees, and  
156 their accuracy, sensitivity, and specificity were determined. Additionally, the study utilised  
157 ROC curve analysis to evaluate classification quality, determining the area under the curve  
158 (AUC) as a measure of model performance. The importance of predictors was assessed,  
159 revealing the most influential variables.

160 Chi-square tests were employed to assess the independence of variables, revealing a significant  
 161 association ( $p < 0.001$ ) between the reason for the call and hospital transfer. Further analyses  
 162 examined the independence of hospital transfer from variables such as gender, EMT type, age,  
 163 pulse, and blood pressure measurements, separately for calls related to hypertension and other  
 164 illnesses.

## 165 **Results**

166 We analyzed the therapeutic management applied by emergency medical teams called for  
 167 intervention due to high blood pressure values or for other reasons, but high blood pressure  
 168 values were noted during the intervention. This study aimed to analyze the effectiveness and  
 169 appropriateness of pharmacological interventions used in such cases. We aimed to analyze the  
 170 effectiveness of emergency medical teams in managing hypertension emergencies and explore  
 171 possibilities for optimizing patient care in similar circumstances.

172 The study was conducted on a sample of 2188 patients, 2144 of whom were included in the  
 173 study. The study included 1597 women and 547 men. It noted that emergency services were  
 174 called approximately three times more often for women than for men, which may suggest  
 175 gender differences in health issues or perception of symptoms. Female participants' ages range  
 176 from 19 to 99 years, with a mean age of 74.63 years and a standard deviation of 12.36 years.  
 177 The median age for female participants was 77 years, reflecting a slight skew towards older  
 178 ages within the cohort. Male participants had an age range of 20 to 97 years, with a mean age  
 179 of 64.88 years and a standard deviation of 15.77 years. The median age for male participants  
 180 was 67 years.

181 Quantitative variables such as blood pressure values from three measurements, heart rate  
 182 values and glucose levels were analysed—table A.

183 Table A. Summary statistics of quantitative variables.

184 N - The number of patients for whom a particular measurement was taken.

185 Min – Max - Minimum and maximum values

186

| <b>Variables</b> | <b>N</b> | <b>Average ± standard deviation</b> | <b>Min – Max</b> | <b>Median</b> |
|------------------|----------|-------------------------------------|------------------|---------------|
| Heart rate       | 2125     | 85,73 ± 16,31                       | 40 – 180         | 82            |

|                             |      |                |           |     |
|-----------------------------|------|----------------|-----------|-----|
| Glucose                     | 1201 | 138,86 ± 50,83 | 32 – 600  | 126 |
| Systolic blood pressure 1.  | 2133 | 191,53 ± 22,71 | 107 – 300 | 190 |
| Systolic blood pressure 2.  | 880  | 161,93 ± 22,18 | 110 – 250 | 160 |
| Systolic blood pressure 3.  | 134  | 163,84 ± 25,41 | 120 – 260 | 160 |
| Diastolic blood pressure 1. | 2128 | 97,96 ± 13,10  | 60 – 170  | 100 |
| Diastolic blood pressure 2. | 879  | 87,29 ± 11,64  | 50 – 165  | 90  |
| Diastolic blood pressure 3. | 134  | 87,17 ± 11,76  | 60 – 140  | 85  |

187 We analysed the effectiveness of an intervention in which captopril and hydroxyzine were  
 188 administered. 1710 (79,76%) patients received captopril. Hydroxyzine was administered to 152  
 189 people (7.09%). Both drugs were given simultaneously to 128 people (5.97%). The analysis  
 190 showed that the applied treatment improved blood pressure parameters in 36.61% of patients,  
 191 while a lack of improvement was observed in 41.47% of individuals.

192 The majority of patients, 84.28%, received intervention from the basic team B-type  
 193 (paramedics only), while the remaining 15.72% were serviced by a specialist team S-type  
 194 (paramedics and a doctor). Significant differences in the treatment administered were observed  
 195 based on the type of emergency medical services team and the reason for the emergency call.  
 196 There are no statistically significant differences in the use of Hydroxyzine depending on the  
 197 type of emergency medical team. Captopril, on the other hand, is more often recommended by  
 198 B-type teams ( $p = 0,021$ ). Furthermore, both Captopril and Hydroxyzine were more frequently  
 199 administered to patients with emergency calls due to hypertension Table B.

200 Table B. Summary of the reason for the call and the treatment used

| Drug | The reason for the call    |                        | p-value (statistics) |
|------|----------------------------|------------------------|----------------------|
|      | Another reason<br>(n=1018) | High blood<br>pressure |                      |
|      |                            |                        |                      |

|             |              |                 |                 |
|-------------|--------------|-----------------|-----------------|
|             |              | <b>(n=1126)</b> |                 |
| Captopril   | 771 (75,74%) | 939 (83,39%)    | <0,001 (18,938) |
| Hydroxyzine | 48 (4,72%)   | 104 (9,24%)     | <0,001 (15,912) |

201

202 No statistically significant differences were observed in the administration of Captopril by age  
 203 group. In each of the study groups, the percentage of patients who received Captopril was about  
 204 80%. Moreover, there are also no statistically significant differences in the frequency of  
 205 Hydroxyzine administration among patient groups by age. However, the percentage of patients  
 206 who were given this drug is not high. Table C.

207 Table C. Use of Captopril and Hydroxyzine in groups distinguished by patient age.

| <b>Drug</b>          | <b>&lt;65 years old<br/>(n=529)</b> | <b>65-79 years old<br/>(n=894)</b> | <b>&gt;80 years old<br/>(n=721)</b> | <b>p-value (statistics)</b> |
|----------------------|-------------------------------------|------------------------------------|-------------------------------------|-----------------------------|
| Captopril<br>n (%)   | 415 (78,4%)                         | 725 (81,1%)                        | 570 (79,1%)                         | 0,412 (1,772)               |
| Hydroxyzine<br>n (%) | 31 (5,9%)                           | 76 (8,5%)                          | 45 (6,2%)                           | 0,095 (4,706)               |

208

209 The decision to transfer patients to the hospital after emergency services intervention was  
 210 significantly different depending on the reason for the emergency call. When the call was due  
 211 to hypertension, 36.23% of patients were transferred to the hospital, while 55.80% were  
 212 transferred when the call was for another illness ( $p < 0.001$ ). Results indicated no influence of  
 213 EMT type on hospital transfer, whether the call was for hypertension ( $p = 0.799$ ) or another  
 214 disease ( $p = 0.795$ ). In cases where the intervention was due to hypertension, gender did not  
 215 influence the decision to transfer to the hospital ( $p = 1$ ). However, for calls related to other  
 216 diseases, male patients were statistically significantly more likely to be transferred to the  
 217 hospital ( $p = 0.027$ ).

218

219



220 Regardless of whether the Emergency Medical Service team was called because of  
 221 hypertension ( $p = 0.867$ ) or another disease ( $p = 0.853$ ), the patient's age does not determine  
 222 the transfer to the hospital. measurements were observed, indicating potential clinical  
 223 relevance. Table D.

224

225

226 Table D. Statistics of quantitative characteristics of patients in the groups of transferred and  
 227 non-transferred patients, divided into patients to whom the Emergency Medical Service was  
 228 called for high blood pressure and another reason.

229 n- number of patients

230

| The reason for the call | Factors                    | Transfer to the hospital |               | Student's t-test |            |         |
|-------------------------|----------------------------|--------------------------|---------------|------------------|------------|---------|
|                         |                            | No                       | Yes           | p-value          | statistics | d Cohen |
| Another reason          | Age                        | <b>n=450</b>             | <b>n=568</b>  | 0,853            | 0,185      | -       |
|                         |                            | 70,1 ±16,17              | 69,9 ±14,55   |                  |            |         |
|                         | Heart rate                 | <b>n=443</b>             | <b>n=561</b>  | <0,001           | -3,560     | -0,217  |
|                         |                            | 85,75 ±13,50             | 89,52 ±19,94  |                  |            |         |
|                         | Systolic blood pressure 1. | <b>n=449</b>             | <b>n=566</b>  | <0,001           | -9,367     | -0,577  |
|                         |                            | 182,48 ±19,29            | 195,23 ±24,07 |                  |            |         |
|                         | Systolic blood pressure 2. | <b>n=216</b>             | <b>n=107</b>  | <0,001           | -7,871     | -1,106  |
|                         |                            | 153,02 ±15,39            | 175,02 ±26,81 |                  |            |         |
|                         | Systolic blood pressure 3. | <b>n=19</b>              | <b>n=10</b>   | 0,012            | -3,047     | -1,542  |
|                         |                            | 152,79 ±11,74            | 186,00 ±33,40 |                  |            |         |
|                         |                            | <b>n=449</b>             | <b>n=567</b>  | <0,001           | -5,470     | -0,338  |

|                     |                             |                               |                               |        |         |        |
|---------------------|-----------------------------|-------------------------------|-------------------------------|--------|---------|--------|
|                     | Diastolic blood pressure 1. | 95,94 ±11,62                  | 100,35 ±14,03                 |        |         |        |
|                     | Diastolic blood pressure 2. | <b>n=217</b><br>84,52 ±9,47   | <b>n=106</b><br>94,96 ±15,60  | <0,001 | -6,344  | -0,883 |
|                     | Diastolic blood pressure 3. | <b>n=19</b><br>84,84 ±8,56    | <b>n=10</b><br>95,00 ±19,00   |        |         |        |
| High blood pressure | Age                         | <b>n=718</b><br>74,1 ±12,16   | <b>n=408</b><br>74,2 ±12,67   | 0,867  | 0,167   | -      |
|                     | Heart rate                  | <b>n=711</b><br>83,17 ±12,20  | <b>n=407</b><br>85,48 ±17,74  |        |         |        |
|                     | Systolic blood pressure 1.  | <b>n=710</b><br>186,86 ±20,26 | <b>n=408</b><br>204,50 ±21,38 | <0,001 | -13,528 | -0,853 |
|                     | Systolic blood pressure 2.  | <b>n=450</b><br>157,03 ±15,67 | <b>n=107</b><br>187,42 ±27,35 |        |         |        |
|                     | Systolic blood pressure 3.  | <b>n=80</b><br>153,64 ±13,20  | <b>n=25</b><br>196,00 ±27,50  | <0,001 | -7,439  | -2,407 |
|                     | Diastolic blood pressure 1. | <b>n=705</b><br>94,90 ±11,67  | <b>n=407</b><br>102,15 ±13,88 |        |         |        |

|  |                             |              |              |        |        |        |
|--|-----------------------------|--------------|--------------|--------|--------|--------|
|  | Diastolic blood pressure 2. | <b>n=449</b> | <b>n=107</b> | <0,001 | -7,845 | -1,090 |
|  |                             | 84,81 ± 8,93 | 95,74 ±13,74 |        |        |        |
|  | Diastolic blood pressure 3. | <b>n=80</b>  | <b>n=25</b>  | <0,001 | -5,203 | -1,446 |
|  |                             | 83,55±8,52   | 97,40±12,43  |        |        |        |

231

232 This analysis is presented as a Classification and Regression Tree (CART) model for predicting  
 233 hospital admission outcomes. The model classifies whether a patient will be admitted to the  
 234 hospital ("YES") or not ("NO") based on various medical and demographic variables. The root  
 235 node starts with 2148 cases, split into 54.6% "NO" and 45.4% "YES," with an overall success  
 236 rate of 0.180. The CART model identifies significant variables such as physical improvement,  
 237 pulse rate, age, reason for EMS call, and improvement status, highlighting their roles in  
 238 predicting hospital admissions. This model provides a structured approach to understanding  
 239 the factors affecting patient outcomes, with potential applications in improving triage and  
 240 patient management protocols.

241 The root node splits based on "physical improvement" at a threshold of 7.5. Patients with a  
 242 value of 7.5 or less are further split by "pulse rate" at 113.5, while those above 7.5 are split by  
 243 the "reason for EMS call," specifically "other disease" and "hypertension." For patients with a  
 244 pulse rate of 113.5 or less, the model further splits based on "age" at 57.5. For those with a  
 245 pulse rate above 113.5, the split is based on "improvement?" categorized as "discharge" or  
 246 "NO, YES." Each node demonstrates varying success rates, indicating the model's ability to  
 247 distinguish between factors influencing hospital admissions. For example, patients with  
 248 "physical improvement" scores above 7.5 and called EMS for "hypertension" have a higher  
 249 admission rate (54.9%). Conversely, older patients (above 57.5) with lower pulse rates are less  
 250 likely to be admitted (31.7%).

251 To determine the factors influencing hospital admissions, the CART decision tree was  
 252 constructed using a dataset divided into ten parts for ten-fold cross-validation. The tree was  
 253 built with 90% of the observations, using variables such as the difference in systolic blood  
 254 pressure, improvement in diastolic pressure, gender, age, type of EMS (P – S), heart rate,

255 glucose level, improvement status (YES-NO-empty), and reason for EMS call (hypertension –  
256 another disease). The resulting ten trees provided values for accuracy, sensitivity, and  
257 specificity, with average values presented in Table 4.4: specificity 58.69%, sensitivity 71.87%,  
258 and accuracy 64.43%. The model's accuracy indicates that it correctly predicts hospital  
259 admissions for nearly 65% of patients. Sensitivity shows that the tree accurately identifies  
260 patients who were admitted (approximately 72%), while specificity indicates that the model  
261 correctly identifies patients who were not admitted (about 60%).

262 In Figure A, two key decision thresholds are marked with orange points. These points have  
263 coordinates (0.41, 0.72), which are derived from default cutoff probability values. These  
264 coordinates represent the sensitivity (true positive rate) and 1-specificity (false positive rate) at  
265 these thresholds. The figure also includes a black point with coordinates (0.54, 0.89), indicating  
266 the optimal cutoff point determined by Youden's index. Youden's index maximizes the sum of  
267 sensitivity and specificity, providing the best balance between true positive and true negative  
268 rates. This point is significant because it helps identify the probability threshold where the  
269 model's performance is most effective. At this threshold, the model correctly classifies 89% of  
270 the patients who need to be admitted and correctly identifies 54% of the patients who do not  
271 need to be admitted. The ROC (Receiver Operating Characteristic) curve associated with these  
272 points helps visualise the trade-off between sensitivity and specificity for different threshold  
273 values. The AUC (Area Under the Curve) of 0.722 indicates that the model has good  
274 discriminative ability, effectively distinguishing between patients who need hospital admission  
275 and those who do not.

276 Figure A illustrates the importance of predictors in the model, with variables like the difference  
277 in systolic blood pressure, diastolic improvement, improvement status, reason for EMS call,  
278 pulse rate, age, gender, and EMS type being significant. The decision points on the tree (Figure  
279 4.2) highlight key thresholds, such as a physical improvement score of 7.5 and a pulse rate of  
280 113.5, which are critical in the classification process. The ROC curve for the model shows an  
281 AUC of 0.722, indicating good classifier performance.

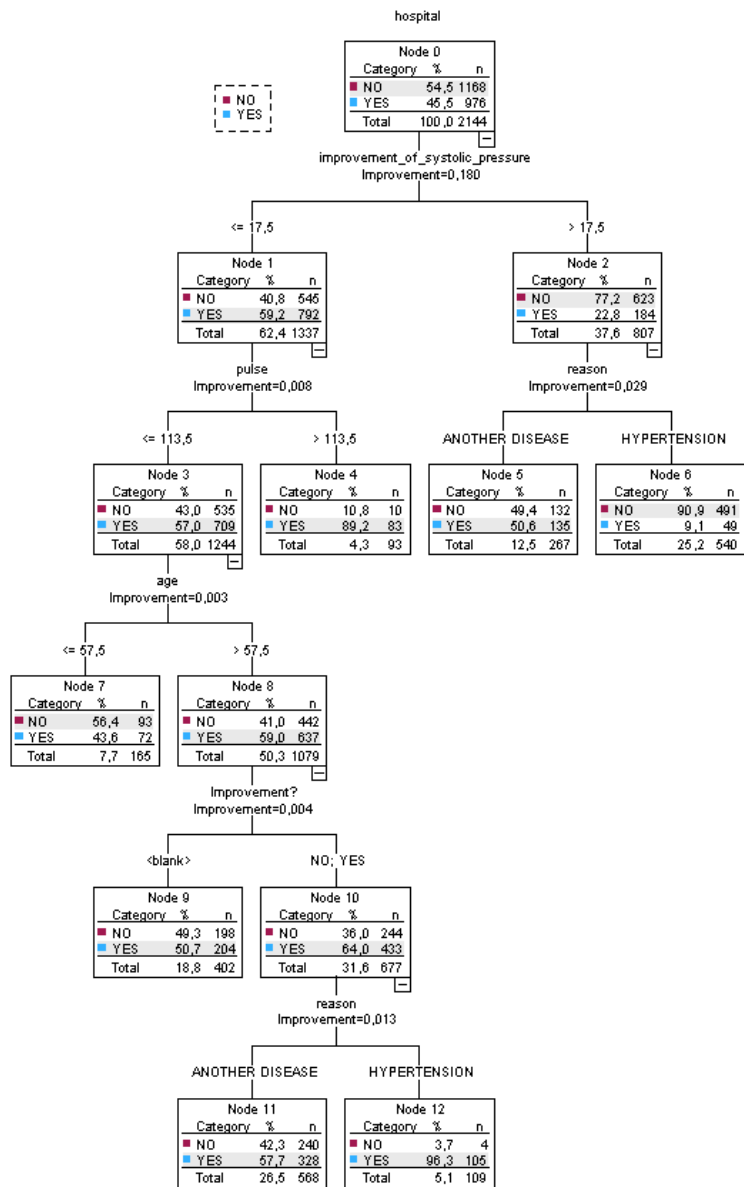

282

283 Figure A

284 The effectiveness of the intervention was determined by physician assessment. It was found  
 285 that in most cases 51,72%, administration of captopril did not result in improvement ( $p =$   
 286 0,015). Conversely, in cases where hydroxyzine was administered, the percentage of patients  
 287 not showing improvement was significantly lower at 42,98% ( $p = 0,025$ ).

288

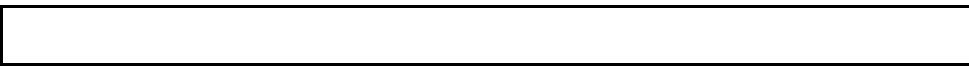

|  |  |  |  |     |                               |
|--|--|--|--|-----|-------------------------------|
|  |  |  |  | 289 | The improvement, defined as a |
|  |  |  |  | 290 |                               |
|  |  |  |  |     |                               |
|  |  |  |  |     |                               |
|  |  |  |  |     |                               |
|  |  |  |  |     |                               |

291 reduction in blood pressure, was determined by the difference in values between the first and  
 292 third blood pressure measurements. Reduction in blood pressure was observed regardless of  
 293 whether pharmacotherapy was administered or not. Table 2.1.-2.4

294 Table E.1. Statistics for systolic blood pressure according to Captopril administration.

| Captopril        | Systolic Blood Pressure 1. | Systolic Blood Pressure 3. | Student's t-test |            |
|------------------|----------------------------|----------------------------|------------------|------------|
|                  |                            |                            | p-value          | statistics |
| Not administered | 220,00 ± 29,28             | 165,63 ± 40,66             | 0,006            | 3,939      |
| Administered     | 203,21 ± 19,83             | 163,72 ± 24,37             | <0,001           | 16,022     |

295

296 Table E.2. Statistics for diastolic blood pressure according to Captopril administration.

| Captopril        | Diastolic Blood Pressure 1. | Diastolic Blood Pressure 3. | Student's t-test |            |
|------------------|-----------------------------|-----------------------------|------------------|------------|
|                  |                             |                             | p-value          | statistics |
| Not administered | 103,75 ± 28,25              | 93,13 ± 21,54               | 0,097            | 1,916      |
| Administered     | 100,55 ± 13,61              | 86,72 ± 10,94               | <0,001           | 11,375     |

297

298 Table E.3. Statistics for systolic blood pressure according to Hydroxyzine administration.

| Hydroxyzine      | Systolic Blood Pressure 1. | Systolic Blood Pressure 3. | Student's t-test |            |
|------------------|----------------------------|----------------------------|------------------|------------|
|                  |                            |                            | p-value          | statistics |
| Not administered | 204,73 ± 20,93             | 164,13 ± 26,22             | <0,001           | 15,255     |
| Administered     | 201,05 ± 19,90             | 162,05 ± 20,25             | <0,001           | 5,873      |

299

300 Table E.4. Statistics for diastolic pressure according to Hydroxyzine administration.

| Hydroxyzine      | Diastolic Blood Pressure 1. | Diastolic Blood Pressure 3. | Student's t-test |            |
|------------------|-----------------------------|-----------------------------|------------------|------------|
|                  |                             |                             | p-value          | statistics |
| Not administered | 100,21 ± 15,52              | 87,29 ± 11,63               | <0,001           | 9,943      |
| Administered     | 103,95 ± 8,43               | 86,05 ± 13,18               | <0,001           | 6,470      |

301

302

303 We verified whether the administration of drugs resulted in higher values of pressure drops  
304 comparing when the drug was not administered. The administration of captopril had no  
305 statistically significant effect on the mean decrease in systolic ( $p = 0.153$ ) or diastolic ( $p =$   
306  $0.519$ ) blood pressure. Similar conclusions were drawn for hydroxyzine concerning systolic ( $p$   
307  $= 0.822$ ) and diastolic ( $p = 0.141$ ) blood pressure. However, it should be noted that this  
308 inference may not be valid due to the small number of patients (134) whose blood pressure was  
309 measured three times, as well as the significant difference in the number of patients who  
310 received and did not receive the drugs.

311

### 312 Discussion

313 The results indicate that captopril impacts blood pressure reduction in acute settings. Among  
314 the 2144 patients analysed, 36.61% showed improvement in blood pressure parameters post-  
315 administration. However, mean values of both systolic and diastolic blood pressure decreased  
316 regardless of whether which drug was administered to patients. In addition, the use of  
317 pharmacotherapy did not result in higher values of blood pressure drop, compared to the group  
318 that did not receive any medication. In our study, we observed that hydroxyzine, despite its  
319 anxiolytic properties, showed only a non-significant trend towards greater blood pressure  
320 reduction compared to captopril. This contrasts with findings from a related study on  
321 midazolam<sup>13</sup>, which demonstrated statistically significant reductions in systolic ( $P = 0.024$ ),  
322 diastolic ( $P = 0.001$ ), and mean blood pressure ( $P = 0.009$ ) following treatment. In that study,  
323 the combination of midazolam and captopril resulted in the greatest BP reductions, with  
324 systolic, diastolic, and mean BP reductions of 23.5% ( $P = 0.047$ ), 17.4% ( $P = 0.021$ ), and 20.5%  
325 ( $P = 0.031$ ), respectively. These results suggest that anxiolytics like midazolam may offer a  
326 more pronounced and rapid effect in lowering blood pressure than hydroxyzine.

327 Given midazolam's effectiveness and faster onset in reducing BP, it raises important  
328 considerations about the role of anxiolytics in acute hypertension management. While

329 hydroxyzine's use in our cohort may be beneficial in anxiety-induced hypertension, the  
330 evidence for midazolam's superior efficacy indicates that it could be a more appropriate choice  
331 in emergency settings, especially when quick BP reduction is critical.

332

333 Additionally, a study by Al-Mahmood et al. (2021) investigated the long-term use of  
334 angiotensin-converting enzyme (ACE) inhibitors, specifically lisinopril, and its impact on  
335 adrenergic receptor response in hypertensive patients. This research demonstrated that  
336 prolonged treatment with lisinopril significantly altered adrenergic receptor responses, which  
337 could enhance the management of hypertension. The findings emphasised the role of ACE  
338 inhibitors in modulating cardiovascular responses and improving outcomes for hypertensive  
339 patients, suggesting that these treatments lead to better blood pressure control and reduced risk  
340 of hypertensive crises. Consequently, the study concluded that ACE inhibitors like lisinopril  
341 are beneficial for the long-term management of hypertension, particularly by mitigating  
342 adrenergic overactivity associated with hypertension and its complications.

343 Moreover, Lin et al. (2021)<sup>14</sup> explored the efficacy of the small molecule compound nerolidol  
344 against hypertension-induced cardiac hypertrophy in spontaneously hypertensive rats. The  
345 study showed that nerolidol administration significantly attenuated Angiotensin-II induced  
346 hypertrophic markers in cardiomyoblasts and reduced blood pressure in hypertensive rats. The  
347 beneficial effects of nerolidol were attributed to its ability to modulate the Mel-18-IGF-IIR  
348 signalling pathway, suggesting its potential as a therapeutic agent in managing hypertension-  
349 related cardiac complications.

350 Interestingly, the study found no statistically significant difference in captopril administration  
351 across different age groups, with about 80% of patients in each age category receiving the drug.  
352 However, considering the updated Beers criteria and other geriatric pharmacotherapy  
353 guidelines, caution is advised when administering captopril to elderly patients, particularly  
354 those over 80, due to the increased risk of adverse effects.

355 The study observed gender differences in the frequency of emergency calls and subsequent  
356 hospital transfers. Women were more likely to call for emergency services, but men were more  
357 often transferred to the hospital. This could suggest that men may present with more severe  
358 symptoms or that there are gender-based differences in symptom perception and reporting.



359 However, the gender of the patient did not influence the decision to transfer when the call was  
360 due to hypertension alone. Interestingly, a study by Todorov et al. (2021)<sup>15</sup> investigated gender  
361 differences in intensive care unit treatment of patients, suggesting women were less likely to  
362 receive intensive care unit treatment regardless of disease severity. Gender differences were  
363 also noted in the prescription of antibiotics, Schröder et al. (2016)<sup>16</sup> women received a  
364 significantly higher number of antibiotic prescriptions than men. It needs future investigation  
365 to provide equal health care regardless of the patient's gender. The decision to transfer patients  
366 to the hospital was significantly influenced by the reason for the emergency call. When  
367 hypertension was the primary concern, 36.23% of patients were transferred, compared to  
368 55.80% for other illnesses. This discrepancy highlights the need for further investigation into  
369 the criteria used for hospital transfers and suggests potential biases or gaps in the decision-  
370 making process of emergency medical teams.

371 Hydroxyzine is primarily indicated for anxiety disorders. Despite not being registered for the  
372 treatment of hypertension, it is sometimes used by emergency medical services teams in cases  
373 of emergency hypertension. This practice raises questions about the correctness of such  
374 interventions. Some research indicates that the intake of anxiolytics (e.g. diazepam,  
375 alprazolam) during blood pressure elevations can have beneficial effects, suggesting it might  
376 reduce unnecessary visits to the emergency room Tandeter et al. (2016)<sup>17</sup>. In our study  
377 hydroxyzine was administered to 152 patients, 68% of these administrations occurred when the  
378 primary reason for the call was high blood pressure. It is possible that the administration of  
379 hydroxyzine was motivated by reasons other than high blood pressure values, such as comorbid  
380 anxiety. Interestingly, most patients showed improvement and a drop in blood pressure after  
381 Hydroxyzine was administered. However, this reduction in blood pressure was observed  
382 regardless of whether pharmacotherapy was administered. This suggests the necessity for  
383 careful administration of drugs, as it exposes patients to potential adverse effects.

384 Based on the discussed studies, it is evident that both immediate and long-term management  
385 strategies are crucial for handling hypertensive emergencies and chronic hypertension.  
386 Midazolam offers rapid relief and is particularly useful in acute settings due to its fast action  
387 and dual role in reducing blood pressure and alleviating stress. ACE inhibitors like lisinopril  
388 provide sustained benefits by modulating adrenergic responses, thereby offering a preventive  
389 approach to managing hypertension. Nerolidol's potential to reduce hypertrophic effects  
390 through specific signalling pathways further enriches the therapeutic landscape. The combined

391 use of rapid-acting agents like midazolam, sustained therapies such as ACE inhibitors, and  
 392 novel compounds like nerolidol provides a robust framework for effective hypertension  
 393 management.

394

### 395 **Hypertension management guidelines**

396

397 Guidelines for treating high blood pressure vary from country to country. One article collected  
 398 48 guidelines from around the world. Analysis of these guidelines showed that, in most cases,  
 399 the guidelines agreed on the definition, severity and target blood pressure recommendations  
 400 for hypertension, but the main differences were in the pharmacological strategies for treating  
 401 hypertension. The most commonly recommended antihypertensive drug classes were  
 402 angiotensin-converting enzyme inhibitors (ACEi), angiotensin receptor blockers (ARBs), beta-  
 403 blockers, calcium channel blockers (CCBs) and diuretics. Of the 47 guidelines that  
 404 recommended ACEi or ARBs, 68% did not recommend either. The remaining 32% of  
 405 guidelines recommended ACEi over ARBs in patients with uncomplicated hypertension.<sup>18</sup>

406 A separate group of patients are geriatric patients, i.e. patients over the age of 65. In 1991,  
 407 Mark Beers and co-workers developed the criteria, the essence of which is the identification of  
 408 drugs that have a negative impact on the health of older people. In 2023, the American Geriatric  
 409 Society (AGS) published another update of the Beers Criteria, a list of drugs that may be  
 410 inappropriate for older patients. These drugs include ACEIs and hydroxyzine. In our study, we  
 411 compared the management of hypertension in geriatric patients according to the European  
 412 Hypertension Treatment Guidelines with the Beers Criteria. (Tab. )

413

414 Tab. Comparison of AGS Beers Criteria 2023 with ESC/ESH Hypertension Guidelines 2018

| <b>Aspect</b> | <b>AGS Beers Criteria 2023<sup>19</sup></b>                       | <b>ESC/ESH Hypertension Guidelines 2018<sup>20</sup></b>  |
|---------------|-------------------------------------------------------------------|-----------------------------------------------------------|
| <b>Focus</b>  | Identifying potentially inappropriate medications for the elderly | Diagnosis, risk assessment, and treatment of hypertension |

|                             |                                                                                                                                                               |                                                                                                                                                               |
|-----------------------------|---------------------------------------------------------------------------------------------------------------------------------------------------------------|---------------------------------------------------------------------------------------------------------------------------------------------------------------|
| <b>Key Recommendations</b>  | Avoid certain medications that pose high risks for older adults, dosing adjustments based on kidney function, alternatives to potentially harmful medications | Individualised treatment strategies based on cardiovascular risk, recommended blood pressure targets, and drug treatment options for different patient groups |
| <b>Methodology</b>          | Review and consensus of expert panel based on current evidence                                                                                                | Systematic review and meta-analysis of relevant clinical trials                                                                                               |
| <b>Outcome Goals</b>        | Reduce adverse drug events, improve medication selection                                                                                                      | Control blood pressure, and reduce the risk of cardiovascular disease                                                                                         |
| <b>Medication Specifics</b> | Detailed list of medications to be avoided or used cautiously                                                                                                 | Specific drug classes recommended for treating hypertension                                                                                                   |

### A reduction in blood pressure

|                                            |                                                                                                                             |                                                                                                                                                                                                                                        |
|--------------------------------------------|-----------------------------------------------------------------------------------------------------------------------------|----------------------------------------------------------------------------------------------------------------------------------------------------------------------------------------------------------------------------------------|
| <b>RAS inhibitors (ACEIs, ARBs, ARNIs)</b> | Avoid routinely 2 or more RAS inhibitors or a RAS inhibitors and potassium-sparing diuretic, increased risk of hyperkalemia | Possible start of treatment with monotherapy, especially in patients over 80 years of age or with frailty syndrome, for the rest, the algorithm recommends starting treatment with dual combination therapy, ACEIs/ARBs + CCB/diuretic |
| <b>CCB - nifedipine</b>                    | Potential for hypotension, risk of precipitating myocardial ischemia                                                        | Calcium channel blockers represent a first-line treatment for hypertension, their use in the elderly is supported by evidence, although there is currently no information available on nifedipine                                      |

|                                                          |                                                                                                                                                                                                                                                                                                                                        |                                                                                                              |
|----------------------------------------------------------|----------------------------------------------------------------------------------------------------------------------------------------------------------------------------------------------------------------------------------------------------------------------------------------------------------------------------------------|--------------------------------------------------------------------------------------------------------------|
| <b>Thiazides and thiazide-like diuretics</b>             | No information available                                                                                                                                                                                                                                                                                                               | First-line treatment for hypertension, their use in the elderly is supported by evidence                     |
| <b>Loop diuretics</b>                                    | No information available                                                                                                                                                                                                                                                                                                               | Should be avoided, their use is associated with injuries due to falls as a result of orthostatic hypotension |
| <b>Hydroxyzinum</b>                                      | Highly anticholinergic; clearance reduced with advanced age; risk of confusion, dry mouth, constipation, and other anticholinergic effects or toxicity; increased risk of falls, delirium and dementia, even in younger adults                                                                                                         | No information available                                                                                     |
| <b>Benzodiazepines (alprazolam, diazepam and others)</b> | Older people have increased sensitivity to benzodiazepines and reduced metabolism of long-acting agents; all benzodiazepines increase cognitive impairment, delirium, falls, fractures and car accidents in older people; there is a high risk of abuse, misuse and dependence. They should only be used in exceptional circumstances. | No information available                                                                                     |

415

416 CCB- calcium channel blockers

417

418

|                   |                                                 |                                    |
|-------------------|-------------------------------------------------|------------------------------------|
| <b>Anxiolytic</b> | <b>Effectiveness in reducing blood pressure</b> | <b>Pressure-reducing mechanism</b> |
|-------------------|-------------------------------------------------|------------------------------------|

|                                     |                                                                                                                                                                                                                                                                                                                                                                                                                                                                                                                                                                                                              |                                                                                                                                                                                                                                                                                                                                                                                                                                                           |
|-------------------------------------|--------------------------------------------------------------------------------------------------------------------------------------------------------------------------------------------------------------------------------------------------------------------------------------------------------------------------------------------------------------------------------------------------------------------------------------------------------------------------------------------------------------------------------------------------------------------------------------------------------------|-----------------------------------------------------------------------------------------------------------------------------------------------------------------------------------------------------------------------------------------------------------------------------------------------------------------------------------------------------------------------------------------------------------------------------------------------------------|
| <p><b>Hydroxyzinum</b></p>          | <p>Hydroxyzine is primarily used to treat anxiety disorders, but it is sometimes employed off-label for emergency hypertension management by emergency medical services. Its effectiveness in reducing blood pressure, however, is not well-supported by statistical evidence. The reductions observed in blood pressure levels after hydroxyzine administration were not significantly different from those in patients who did not receive pharmacotherapy, indicating that its impact on blood pressure might be attributed to its anxiolytic properties rather than a direct antihypertensive effect</p> | <p>Hydroxyzine works by reducing anxiety, which can indirectly contribute to lowering blood pressure. Anxiety can trigger sympathetic discharge, leading to increased blood pressure. By alleviating anxiety, hydroxyzine may help reduce this sympathetic response. However, the drug's use must be carefully considered, particularly in elderly patients due to potential side effects such as confusion, falls, and other anticholinergic effects</p> |
| <p><b>Diazepam<sup>12</sup></b></p> | <p>Thirty-six patients (28 women and 8 men), with excessive hypertension (&gt;190/100 mm Hg), were randomized to receive either oral diazepam, 5 mg (<i>n</i> = 17, study group) or sublingual captopril, 25 mg (<i>n</i> = 19, control group). Both</p>                                                                                                                                                                                                                                                                                                                                                     | <p>Diazepam exerts its antihypertensive effects primarily through its potent anxiolytic properties. As a benzodiazepine, diazepam enhances the effect of the neurotransmitter gamma-aminobutyric acid (GABA) at the GABA-A receptor,</p>                                                                                                                                                                                                                  |

|                                 |                                                                                                                                                                                                                 |                                                                                                                                                                                                                                                                                                                                                                                            |
|---------------------------------|-----------------------------------------------------------------------------------------------------------------------------------------------------------------------------------------------------------------|--------------------------------------------------------------------------------------------------------------------------------------------------------------------------------------------------------------------------------------------------------------------------------------------------------------------------------------------------------------------------------------------|
|                                 | treatments decreased BP significantly.                                                                                                                                                                          | resulting in sedative, muscle-relaxant, and anxiolytic effects. This mechanism reduces sympathetic nervous system activity, which is often elevated during periods of high anxiety, thereby lowering blood pressure. Additionally, diazepam's ability to calm patients can mitigate stress-induced hypertensive spikes, providing a dual benefit in managing both anxiety and hypertension |
| <b>Alprazolam</b> <sup>21</sup> | 53 patients were enrolled, of whom 27 patients received captopril and 26 patients received alprazolam, alprazolam in a dose of 0.5 mg was as effective as captopril in a dose 25 mg in reducing blood pressure. | Most patients had a high level of anxiety. Anxiety is known to trigger sympathetic discharge, which can lead to increased blood pressure. Alprazolam belongs to the group of benzodiazepines that exhibit anxiolytic, sleep-inducing, sedative, myorelaxant and anticonvulsant effects.                                                                                                    |
| <b>Midazolam</b> <sup>13</sup>  | Midazolam has been shown to significantly reduce blood pressure in acute settings. Studies indicate that midazolam, when administered for                                                                       | The primary mechanism through which midazolam reduces blood pressure is its potent anxiolytic and sedative effects, which alleviate stress-induced                                                                                                                                                                                                                                         |

|  |                                                                                                                                                                                                                                                             |                                                                                                                                                          |
|--|-------------------------------------------------------------------------------------------------------------------------------------------------------------------------------------------------------------------------------------------------------------|----------------------------------------------------------------------------------------------------------------------------------------------------------|
|  | <p>hypertensive emergencies, produces substantial reductions in systolic, diastolic, and mean blood pressure. Specifically, midazolam can decrease systolic blood pressure by approximately 23.5%, diastolic by 17.4%, and mean blood pressure by 20.5%</p> | <p>hypertension. By mitigating sympathetic nervous system activation, midazolam effectively lowers elevated blood pressure levels rapidly and safely</p> |
|--|-------------------------------------------------------------------------------------------------------------------------------------------------------------------------------------------------------------------------------------------------------------|----------------------------------------------------------------------------------------------------------------------------------------------------------|

419

## 420 **Limitations and recommendations**

421 This study's retrospective design and the exclusion of patients with incomplete data present  
 422 limitations. Future research should include larger sample sizes and prospective analyses to  
 423 validate these findings. Additionally, there should be a focus on developing standardised  
 424 protocols for the use of captopril and other antihypertensive agents in emergency settings,  
 425 particularly for elderly patients and those with comorbid conditions.

426 While captopril remains a valuable tool for managing acute hypertension in emergency medical  
 427 settings, its use must be carefully considered, especially in older adults. Further research is  
 428 warranted to optimise treatment protocols and ensure the safety and efficacy of hypertension  
 429 management in emergency care.

430

## 431 **Conclusion**

432 Captopril remains a cornerstone treatment for acute hypertension, demonstrating significant  
 433 efficacy in blood pressure reduction across diverse patient demographics. However, the study  
 434 highlights the potential role of hydroxyzine, particularly in patients whose hypertension may  
 435 be exacerbated by anxiety, suggesting that its sedative and anxiolytic properties could offer  
 436 therapeutic benefits. Despite these observations, the lack of significant statistical evidence and  
 437 existing medical guidelines cautioning against hydroxyzine use in elderly patients indicate a  
 438 need for further research. These results advocate for a balanced and individualised approach to

439 hypertensive crisis management, incorporating both established and novel therapeutic  
440 strategies to optimise patient outcomes. Although the literature on the topic is limited, we  
441 acknowledge the fact of various uses in clinical practice as anxiety is common in case of high  
442 blood pressure and may worsen the problem.

443 Analysis of this data indicates the need for further research into the effectiveness and safety of  
444 the drugs used in emergency medical services interventions, especially considering the  
445 recommendations for drug use in the elderly and differences in therapeutic approach depending  
446 on the type of emergency medical services intervention and reason for the call.

#### 447 **Acknowledgments**

448 None.

#### 449 **Sources of funding**

450 No external funding.

#### 451 **Disclosures**

452 None.

#### 453 **Bibliography**

- 454 1. Główny Urząd Statystyczny / Obszary tematyczne / Zdrowie / Zdrowie / Pomoc doraźna i  
455 ratownictwo medyczne w 2022 roku. (n.d.). Retrieved September 9, 2024, from  
456 [https://stat.gov.pl/obszary-tematyczne/zdrowie/zdrowie/pomoc-dorazna-i-ratownictwo-](https://stat.gov.pl/obszary-tematyczne/zdrowie/zdrowie/pomoc-dorazna-i-ratownictwo-medyczne-w-2022-roku,14,7.html)  
457 [medyczne-w-2022-roku,14,7.html](https://stat.gov.pl/obszary-tematyczne/zdrowie/zdrowie/pomoc-dorazna-i-ratownictwo-medyczne-w-2022-roku,14,7.html).
- 458 2. Bloom, A. S. & Schranz, C. Angiotensin-Converting Enzyme Inhibitor–Induced  
459 Angioedema of the Small Bowel—A Surgical Abdomen Mimic. *J. Emerg. Med.* **48**,  
460 e127–e129 (2015).
- 461 3. Gilyarevsky, S. R. *et al.* Evidence-Based Information Which Could Influence Arterial  
462 Hypertension Treatment Approach after Publication of SPRINT Trial Results.  
463 *Kardiologia* **60**, 130–140 (2020).



- 464 4. Whelton, P. K. *et al.* 2017  
465 ACC/AHA/AAPA/ABC/ACPM/AGS/APhA/ASH/ASPC/NMA/PCNA Guideline for the  
466 Prevention, Detection, Evaluation, and Management of High Blood Pressure in Adults: A  
467 Report of the American College of Cardiology/American Heart Association Task Force  
468 on Clinical Practice Guidelines. *Hypertension* **71**, (2018).
- 469 5. Van Den Born, B.-J. H. *et al.* ESC Council on hypertension position document on the  
470 management of hypertensive emergencies. *Eur. Heart J. - Cardiovasc. Pharmacother.* **5**,  
471 37–46 (2019).
- 472 6. McEvoy, J. W. *et al.* 2024 ESC Guidelines for the management of elevated blood  
473 pressure and hypertension. *Eur. Heart J.* ehae178 (2024) doi:10.1093/eurheartj/ehae178.
- 474 7. Karakiliç, E., Büyükcam, F., Kocalar, G., Gedik, S. & Atalar, E. Same effect of  
475 sublingual and oral captopril in hypertensive crisis. *Eur. Rev. Med. Pharmacol. Sci.* **16**,  
476 1642–1645 (2012).
- 477 8. Brown, N. J. & Vaughan, D. E. Angiotensin-Converting Enzyme Inhibitors. *Circulation*  
478 **97**, 1411–1420 (1998).
- 479 9. Schoolwerth, A. C., Sica, D. A., Ballermann, B. J. & Wilcox, C. S. Renal Considerations  
480 in Angiotensin Converting Enzyme Inhibitor Therapy: A Statement for Healthcare  
481 Professionals From the Council on the Kidney in Cardiovascular Disease and the Council  
482 for High Blood Pressure Research of the American Heart Association. *Circulation* **104**,  
483 1985–1991 (2001).
- 484 10. Romankiewicz, J. A., Brogden, R. N., Heel, R. C., Speight, T. M. & Avery, G. S.  
485 Captopril: An Update Review of its Pharmacological Properties and Therapeutic Efficacy  
486 in Congestive Heart Failure. *Drugs* **25**, 6–40 (1983).
- 487 11. Leier, C. V. *et al.* Captopril in primary pulmonary hypertension. *Circulation* **67**, 155–161  
488 (1983).

- 489 12. Grossman, E. *et al.* Antianxiety Treatment in Patients With Excessive Hypertension. *Am.*  
490 *J. Hypertens.* **18**, 1174–1177 (2005).
- 491 13. Khorsand, M. R., Enayatrad, M., Yekesadat, S. M., Khodayar, M. & Noyani, A.  
492 Comparison of midazolam versus captopril in patients with uncomplicated hypertensive  
493 urgency in emergency ward: Double-blind randomized clinical trial. *ARYA Atheroscler.*  
494 **18**, 1–8 (2022).
- 495 14. Lin, Y.-M. *et al.* Small Molecule Compound Nerolidol attenuates Hypertension induced  
496 hypertrophy in spontaneously hypertensive rats through modulation of Mel-18-IGF-IIR  
497 signalling. *Phytomedicine* **84**, 153450 (2021).
- 498 15. on behalf of the Swiss Society of Intensive Care Medicine *et al.* Gender differences in the  
499 provision of intensive care: a Bayesian approach. *Intensive Care Med.* **47**, 577–587  
500 (2021).
- 501 16. Schröder, W. *et al.* Gender differences in antibiotic prescribing in the community: a  
502 systematic review and meta-analysis. *J. Antimicrob. Chemother.* **71**, 1800–1806 (2016).
- 503 17. Tandeter, H. Hypothesis: A single dose of an anxiolytic may prevent unnecessary visits to  
504 the emergency room during blood pressure elevations. *Med. Hypotheses* **88**, 35–37  
505 (2016).
- 506 18. Philip, R. *et al.* Variation in hypertension clinical practice guidelines: a global  
507 comparison. *BMC Med.* **19**, 117 (2021).
- 508 19. By the 2023 American Geriatrics Society Beers Criteria® Update Expert Panel.  
509 American Geriatrics Society 2023 updated AGS Beers Criteria® for potentially  
510 inappropriate medication use in older adults. *J. Am. Geriatr. Soc.* **71**, 2052–2081 (2023).
- 511 20. Williams, B. *et al.* 2018 ESC/ESH Guidelines for the management of arterial  
512 hypertension. *Eur. Heart J.* **39**, 3021–3104 (2018).
- 513 21. Yilmaz, S., Pekdemir, M., Tural, Ü. & Uygun, M. Comparison of alprazolam versus

514       captopril in high blood pressure: A randomized controlled trial. *Blood Press.* **20**, 239–243  
515       (2011).
